# Supplementary material
Source: PubMed Central journal article supplement (PMC7137059)
Supplement: ajtr0012-1080-f8.pdf [file ajtr0012-1080-f8.pdf]

## Exosome promotes liver cancer metastasis

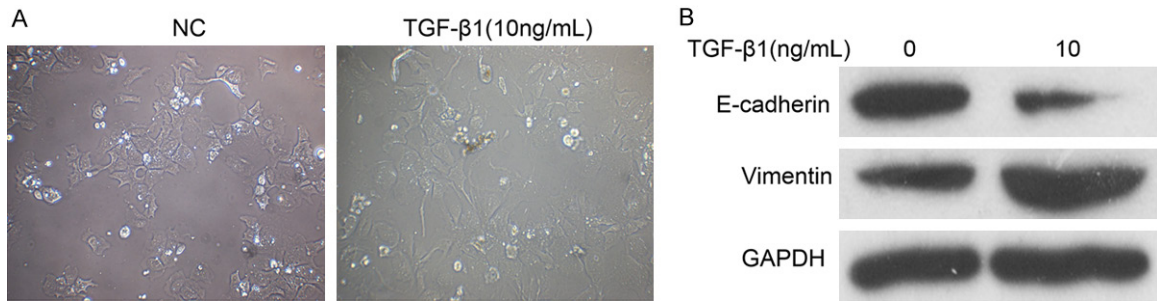

**Figure S1.** TGF- $\beta$  treatment of Hep3B cells induces EMT. A. Changes in Hep3B cells morphology after TGF- $\beta$ 1 stimulation. The cells appeared square shaped before treatment and progressively changed to distinct fusiform shape. B. EMT markers (vimentin and E-cadherin) were detected by western blot.
